# Estimating the geographic range of a threatened shark in a data-poor region: *Cetorhinus maximus* in the South Atlantic Ocean

Luis O. LUCIFORA<sup>1\*</sup>, Santiago A. BARBINI<sup>2</sup>, Edgardo E. DI GIÁCOMO<sup>3</sup>,  
Juan A. WAESSLE<sup>4</sup>, Daniel E. FIGUEROA<sup>2</sup>

<sup>1</sup> Instituto de Biología Subtropical – Iguazú, Consejo Nacional de Investigaciones Científicas y Técnicas, Universidad Nacional de Misiones, Puerto Iguazú, Misiones, Argentina

<sup>2</sup> Laboratorio de Ictiología, Instituto de Investigaciones Marinas y Costeras, Consejo Nacional de Investigaciones Científicas y Técnicas, Universidad Nacional de Mar del Plata, Mar del Plata, Provincia de Buenos Aires, Argentina

<sup>3</sup> Grupo Condros, Instituto de Biología Marina y Pesquera “Almirante Storni”, Universidad Nacional del Comahue, San Antonio Oeste, Río Negro, Argentina

<sup>4</sup> Instituto Nacional de Investigación y Desarrollo Pesquero, Mar del Plata, Provincia de Buenos Aires, Argentina

**Abstract** The distribution of the planktivorous basking shark *Cetorhinus maximus* is influenced by zooplankton abundance at small scales and temperature at medium scales in the North Atlantic. Here, we estimate the distribution of basking sharks on South Atlantic continental shelves, and the relative importance of chlorophyll concentration, as a proxy for zooplankton abundance, and temperature in determining habitat suitability for basking sharks at large scales. We used maximum entropy (MaxEnt) and maximum likelihood (MaxLike) species distribution modelling to test three hypotheses: the distribution of basking sharks is determined by (1) temperature, (2) chlorophyll concentration, or (3) both chlorophyll and temperature, while considering other factors, such as oxygen and salinity. Off South America, basking shark habitat included subtropical, temperate and cool-temperate waters between approximately 20°S and 55°S. Off Africa, basking shark habitat was limited to cool-temperate waters off Namibia and southern South Africa. MaxLike models had a better fit than MaxEnt models. The best model included minimum chlorophyll concentration, dissolved oxygen concentration, and sea surface temperature range, supporting hypothesis 3. However, of all variables included in the best model, minimum chlorophyll concentration had the highest influence on basking shark distribution. Unlike the North Atlantic distribution, the South Atlantic distribution of basking sharks includes subtropical and cool-temperate waters. This difference is explained by high minimum chlorophyll concentration off southern Brazil as compared to North Atlantic subtropical areas. Observations in other regions of the world support this conclusion. The highest habitat suitability for basking sharks is located close to nearshore areas that experience high anthropogenic impact [*Current Zoology* 61 (5): 811–826, 2015].

**Keywords** Basking shark, Chondrichthyes, Geographic range, MaxEnt, MaxLike, Southern Hemisphere

Large-scale spatial distribution patterns are important for conservation planning, especially for highly mobile large pelagic animals, such as sharks. Large pelagic sharks can move long distances (thousands of km), which results in wide distributions, often ranging across entire ocean basins, and crossing multiple national jurisdictions and levels of protection (Bonfil et al., 2005; Southall et al., 2006; Saunders et al., 2011; Howey-Jordan et al., 2013; Sequeira et al., 2013). The large geographic extent of the ranges of these species complicates the assessment of habitat requirements necessary for conservation planning. For this reason, large-scale habitat suitability modelling may play an important role in pe-

lagic shark ecological and conservation science (Sequeira et al., 2012).

The basking shark *Cetorhinus maximus* is widely distributed in temperate to cool-temperate waters in the Pacific and Atlantic Oceans at temperatures between 8 and 24°C (Compagno, 2001), with only scattered records in subtropical and tropical waters (Compagno et al., 2005). These sharks can move over considerable distances travelling from eastern to western North Atlantic continental shelves (Gore et al., 2008), and moving between northwest Atlantic temperate waters and equatorial mesopelagic waters (Skomal et al., 2009). However, basking sharks that have been tagged in the North

Received Aug. 15, 2014; accepted Nov. 20, 2014.

\* Corresponding author. E-mail: luis.lucifora@conicet.gov.ar

© 2015 *Current Zoology*

Atlantic tended to spend the majority of their tracks in highly productive continental shelf waters (Sims et al., 2003; Skomal et al., 2004; Southall et al., 2005, 2006; Gore et al., 2008).

Factors or resources determining basking shark distribution appear to vary with scale. At small scales (0.01 to 10 km), zooplankton abundance is a highly significant predictor of basking shark distribution and abundance. Basking sharks tend to congregate in continental shelf waters with high zooplankton concentrations (Sims et al., 1997, 2003; Sims and Quayle, 1998; Soldo et al., 2008; Curtis et al., 2014). A decrease in abundance of basking sharks off western Ireland between 1949 and 1975 is thought to have been a consequence of a contemporary decline in zooplankton (Sims and Reid, 2002). At medium spatial scales (10–1000 km), temperature appears to be the most influential factor determining basking shark occurrence (Cotton et al., 2005). At these larger scales, habitat choice seems driven more by thermal optimization, which reduces metabolic costs and increase net energy gain, than food abundance (Cotton et al., 2005). These analyses have been conducted in the North Atlantic. To what extent these results can be extended to other regions is not known. In addition, factors or resources determining basking shark occurrence at larger spatial scales (1,000–10,000 km) are unknown. They may include oxygen concentration or salinity, which are well known to affect shark distribution at varying scales (e.g. Heithaus et al., 2009; Nasby-Lucas et al. 2009; Abascal et al., 2011). There is no available information on significant determinants of basking shark distribution in the Southern Hemisphere at any scale.

In the Southern Hemisphere, basking sharks have been reported in waters from all continental shelves, except Antarctica. While basking sharks are rare off southern Australia (Last and Stevens, 2009), they are common in the cool-temperate waters off New Zealand's South Island (39°–51°S), and much less common off the North Island (Francis and Duffy, 2002). Off Chile, basking sharks appear to be seasonally common (Hernández et al., 2010), and off southern Africa, basking sharks occur in cool-temperate waters of the Benguela current (Compagno et al., 1989). Off South America's east coast, basking sharks are considered to be rare. However, records indicate that they are (or historically were) relatively common off southern Brazil (Soto, 2000; Soto et al., 2007). Basking sharks have been caught occasionally in gillnet and bottom trawl fisheries off Uruguay (Domingo et al., 2008). Further south, they have been

recorded off northern Argentina (Siccardi, 1960), the northern Patagonian gulfs (Lahille, 1928; Van Der Molen et al., 1998; Perier et al., 2011), and off the Malvinas/Falkland Islands' northern shore (Norman, 1937). The basking sharks is categorized as Vulnerable at a global scale (Fowler, 2005) and Endangered in the Northeast Atlantic and North Pacific (Fowler, 2009a,b) mainly because of overfishing for the international shark fin trade. This led to the inclusion of the species in CITES Appendix II, which imposes the tracking of the international trade of products derived from basking sharks. Today, the most significant threat to basking sharks is fishing for their fins, which are among the most valuable in the international trade (Clarke, 2004). Despite these regulations, a large fraction of the international trade in basking shark fins is unrecognized (Magnussen et al., 2007).

In this paper, we compiled all known confirmed records of basking sharks in the South Atlantic, including unpublished records presented here for the first time, and used them to model the geographic range of basking sharks in the region. Our objectives were (1) to estimate the geographic distribution of basking sharks on South Atlantic continental shelves, and (2) to estimate the relative importance of several factors, including chlorophyll concentration – as a proxy for zooplankton abundance – and temperature, as well as dissolved oxygen and salinity in determining habitat suitability of basking sharks on South Atlantic continental shelves.

## 1 Materials and Methods

### 1.1 Data Sources

For the southwest Atlantic we used two primary sources of records: the scientific literature, and the database of the Onboard Fishery Observers Program of the Instituto Nacional de Investigación y Desarrollo Pesquero (Argentina). This database contains information on species caught by fishing vessels covered by the program, including photographs to check species identification, from 2003 to February 2013. For the southeast Atlantic, we used data from the Fish Collection and the Shark Collection (AfroBIS) of the Iziko South African Museum, accessed from the Global Biodiversity Information Facility data portal. We inspected all data to remove duplicates (i.e. records with the same date and location).

The study area was defined according to the coverage of the various data sources used. While we are aware that basking sharks have been occasionally recorded in oceanic waters (McKinnell and Seki, 1998; Gore et al.,

2008; Skomal et al., 2009), we restricted our study area to continental shelf waters because all South Atlantic records of basking sharks come from continental shelves, which may bias estimations of oceanic habitat suitability. In addition, most tracked basking sharks occur preferentially in continental shelf waters (Sims et al., 2003; Skomal et al., 2004; Southall et al., 2005, 2006; Gore et al., 2008), indicating that this habitat plays an important role in basking shark biology. Off South America, the latitudinal limits of the study area were set at 60°S, i.e. the southern limit of the Onboard Fishery Observers Program, and the northern limit approximately at 6°N, which corresponds to the northernmost extension of the Brazilian coast surveyed by Soto (2000). The western boundary of the study area was set close to the Argentinean-Chilean border, south of Tierra del Fuego (70°W); the eastern boundary at 30°W, includes South Georgia (Fig. 1). Off Africa, the study area was between 14°S (the northernmost extension of the Benguela system; Sakko, 1998) to the southernmost extension of the continental shelf, and between 2°E and the easternmost extension of the South

African coast, 32.9°E, at the border between South Africa and Mozambique (Fig. 1). Within these broad areas, the analyses were further restricted to the continental shelf and upper slope, defined as the area between the shoreline and the 500 m isobath.

Environmental predictors were obtained from the Bio-ORACLE database (Tyberghein et al., 2012). This database contains high-resolution (5 arcmin or 9 km) layers of multiple environmental variables of the ocean that were used in the models of the species distribution. We initially selected a set of variables potentially important in determining basking shark distribution on the basis of previously published information, i.e. mean, minimum, maximum, and range chlorophyll concentration, mean dissolved oxygen concentration, mean, minimum, maximum, and range sea surface temperature, and mean salinity. We interpreted mean values of all variables as a measurement of the mean effect of these variables on basking shark distribution. Maximum and minimum sea surface temperature can influence thermal upper and lower limits of the distribution of basking sharks. Range sea surface temperature is a measurement

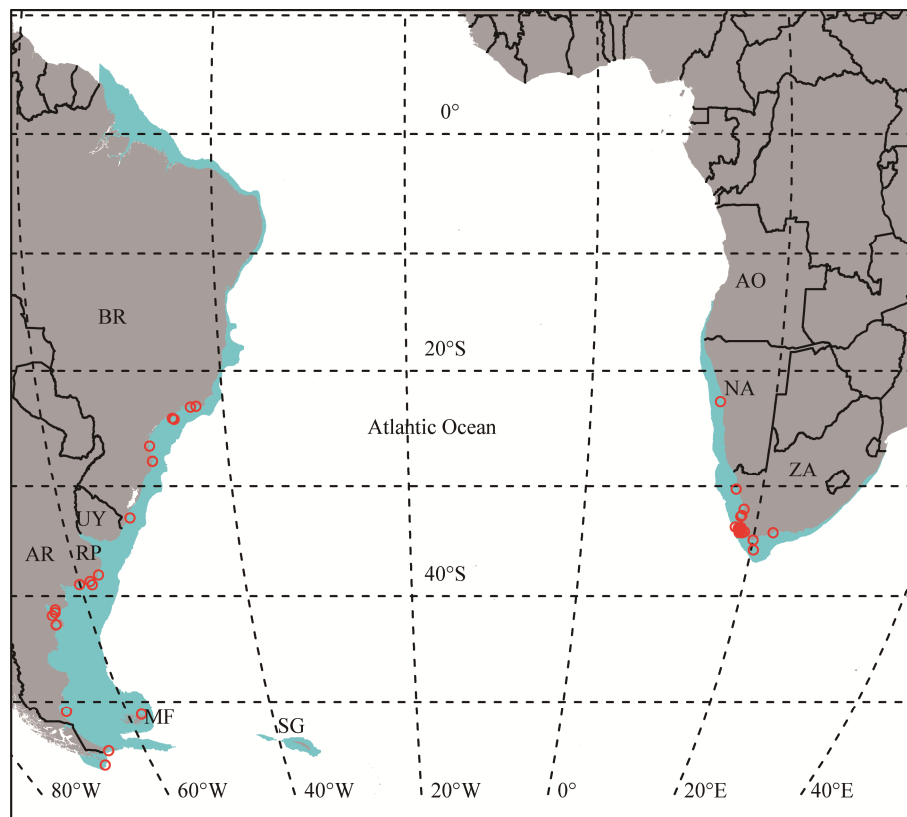

**Fig. 1** Map of the South Atlantic Ocean showing continental shelves (0–500 m depth) included in the study area (cyan-colored area) to estimate the geographic range of basking sharks *Cetorhinus maximus*

Known records of basking sharks used in the analyses are shown as red circles. AO = Angola, AR = Argentina, BR = Brazil, MF = Malvinas/Falkland Islands, NA = Namibia, RP = Río de la Plata, SG = South Georgia, UY = Uruguay, ZA = South Africa. Map projection is Mollweide equal area.

of the variability in temperature that is usually associated to frontal areas. We used chlorophyll *a* concentration as a proxy for zooplankton abundance – the main food of basking sharks, given the general positive correlation between phyto- and zooplankton biomass (Irigoien et al., 2004). Maximum and minimum chlorophyll *a* concentration could be indicative of the influence of an abundance and a scarcity of food on basking shark distribution. Range in chlorophyll *a* concentration was included as an indicator of variability in food supply to basking sharks. While the focus of our work was to evaluate the relative importance of temperature and chlorophyll *a* concentration (as a proxy of planktonic productivity), we included other available variables known to affect the distribution of elasmobranchs, such as mean dissolved oxygen concentration (Nasby-Lucas et al., 2009; Abascal et al., 2011) and mean salinity (Cortés et al., 2011; Drymon et al., 2013).

## 1.2 Modelling

We postulated three competing hypotheses explaining basking shark distribution in South Atlantic shelf waters: (1) chlorophyll is the most important determinant, (2) temperature is a key determinant, and (3) both variables affect basking shark distribution. To test these hypotheses, we built three kinds of models: (1) Models containing only chlorophyll variables, plus other covariates, i.e. dissolved oxygen and salinity, (2) models containing only temperature variables, plus other covariates, and (3) Models containing both temperature and chlorophyll variables, plus their interaction and other covariates. After fitting the models we selected the one with the best fit to the data as the best hypothesis explaining basking shark distribution on South Atlantic continental shelves.

We used two modelling approaches to test our hypotheses, both based on presence and background data: one based on maximum entropy estimation (MaxEnt; Phillips et al., 2006; Elith et al., 2011) and another based on maximum likelihood (MaxLike; Royle et al., 2012). MaxEnt uses a sample of environmental data, called the background. Then, it determines the geographic range by finding a function that maximizes the information entropy between the distribution of the background subject to constraints imposed by the presence records. MaxLike uses all background data of the study area to estimate the probability of occurrence of a species. It accomplishes this by maximizing the likelihood conditioned on the probability of observing a cell given the species is present.

Prior to fitting models, we inspected the relationships

between each pair of predictors in order to avoid multicollinearity. Variable pairs that had a correlation coefficient  $> 0.5$  were not included together in the same model.

We implemented the MaxEnt modelling in MaxEnt version 3.3.3k within the library 'dismo' (Hijmans et al., 2013) in the statistical software R, version 12.5.2 (R Core Team, 2012). MaxEnt generates maps of habitat suitability scaled from 0 (lowest suitability) to 1 (highest suitability) (Phillips et al., 2006; Elith et al., 2011).

We ran each MaxEnt model 100 times (the maximum number of replicates allowed by our computing power) (Dambach and Rödder, 2011), then, we obtained a mean response model from the 100 runs. Each time, a random sample of 33% of the dataset (i.e. 15 presence records) was saved to test the model. Model fit was evaluated by means of the True Skill Statistic (TSS), as recommended by Allouche et al. (2006). TSS ranges between -1 and 1, with 1 indicating perfect fit and values of 0 or less indicate a performance not better than random (Allouche et al., 2006). The threshold used in the calculation of TSS maximized the sum of sensitivity and specificity (Liu et al., 2013).

MaxLike modelling was conducted using the library 'maxlike' version 0.1.5 (Royle et al., 2012) in R, version 12.5.2. Before fitting MaxLike models all variables were standardized, as recommended by Royle et al. (2012). The Akaike Information Criterion (AIC) was computed for each MaxLike model and the model with the lowest AIC was chosen as the one with the best fit. Akaike weight ( $w$ ) was also calculated for each model to determine the relative importance of each variable included in the best model. The Bayesian Information Criterion (BIC) was also computed for each MaxLike model.

We compared the fit of the best MaxEnt and MaxLike models with TSS.

To obtain the range map, i.e. a binary map encompassing the highest habitat suitability or probability of occurrence, a threshold was applied to the results of the best MaxEnt and MaxLike models. As before, the chosen threshold was the one that maximized the sum of sensitivity and specificity (Liu et al., 2013).

## 2 Results

We identified 46 confirmed records of basking sharks in the South Atlantic Ocean, 22 off southern Africa and 24 off South America (Fig. 1). Of the South American records, 4 (16%) were not reported previously. These new records substantially expanded the known geographic range of basking sharks to the southern Patagonian shelf (Table 1).

**Table 1 Occurrences of basking shark *Cetorhinus maximus* used to model its distribution on continental shelves of the South Atlantic Ocean**

| Record number | Longitude | Latitude | Location                                                                | Source                                                   |
|---------------|-----------|----------|-------------------------------------------------------------------------|----------------------------------------------------------|
| 1             | -68.333   | -51.042  | Southern Patagonia, Argentina.                                          | INIDEP, unpublished.                                     |
| 2             | -67.097   | -56.468  | Southern Patagonia, Argentina.                                          | INIDEP, unpublished.                                     |
| 3             | -65.355   | -54.992  | Southern Patagonia, Argentina.                                          | INIDEP, unpublished.                                     |
| 4             | -64.683   | -41.833  | Golfo San Matías, Río Negro, Argentina.                                 | Van der Molen et al., 1998                               |
| 5             | -64.633   | -42.683  | Golfo Nuevo, Chubut, Argentina.                                         | Lahille, 1928                                            |
| 6             | -58.133   | -51.300  | Between McBryde's Head and Salvador, Malvinas/Falkland Islands.         | Norman, 1937                                             |
| 7             | -57.450   | -38.000  | 3 nautical miles off Mar del Plata, Buenos Aires, Argentina.            | Siccardi, 1960                                           |
| 8             | -58.683   | -38.600  | Puerto Quequén, Buenos Aires, Argentina.                                | Siccardi, 1960                                           |
| 9             | -58.683   | -38.600  | Puerto Quequén, Buenos Aires, Argentina.                                | Siccardi, 1960                                           |
| 10            | -58.533   | -38.900  | 20 nautical miles southwest of Puerto Quequén, Buenos Aires, Argentina. | Siccardi, 1960                                           |
| 11            | -60.067   | -38.883  | Claromecó, Buenos Aires, Argentina.                                     | Photo from local newspaper "El Periodista", unpublished. |
| 12            | -64.083   | -41.300  | Golfo San Matías, Río Negro, Argentina.                                 | Perier et al., 2011                                      |
| 13            | -64.217   | -41.567  | Golfo San Matías, Río Negro, Argentina.                                 | Perier et al., 2011                                      |
| 14            | -45.667   | -24.083  | Ilha de Alcatrazes, São Paulo, Brazil.                                  | Soto, 2000                                               |
| 15            | -43.567   | -23.120  | Praia do Canto, Barra de Guaratiba, Rio de Janeiro, Brazil.             | Soto, 2000                                               |
| 16            | -45.483   | -24.167  | Ponta da Sela, Ilhabela, São Paulo, Brazil.                             | Soto, 2000                                               |
| 17            | -43.567   | -23.120  | Praia do Canto, Barra de Guaratiba, Rio de Janeiro, Brazil.             | Soto, 2000                                               |
| 18            | -48.567   | -26.467  | Barra do Sul, Araquari, Santa Catarina, Brazil.                         | Soto, 2000                                               |
| 19            | -52.170   | -32.860  | Off southern Rio Grande do Sul, Brazil.                                 | Soto, 2000                                               |
| 20            | -48.490   | -27.775  | Pântano do Sul, Florianópolis, Santa Catarina, Brazil.                  | Soto, 2000                                               |
| 21            | -48.489   | -27.789  | Pântano do Sul, Florianópolis, Santa Catarina, Brazil.                  | Soto, 2000                                               |
| 22            | -48.490   | -27.775  | Pântano do Sul, Florianópolis, Santa Catarina, Brazil.                  | Soto, 2000                                               |
| 23            | -48.490   | -27.775  | Pântano do Sul, Florianópolis, Santa Catarina, Brazil.                  | Soto, 2000                                               |
| 24            | -42.960   | -23.050  | 50 m off the beach of Itaipuaçu, Niterói, Rio de Janeiro, Brazil.       | Soto et al., 2007                                        |
| 25            | 20.267    | -35.733  | Agulhas Bank, South Africa.                                             | AfrOBIS                                                  |
| 26            | 18.200    | -34.065  | Hout Bay, Western Cape, South Africa.                                   | AfrOBIS                                                  |
| 27            | 18.300    | -34.083  | Llandudno, Western Cape, South Africa.                                  | AfrOBIS                                                  |
| 28            | 18.800    | -34.100  | Strand, False Bay, Western Cape, South Africa.                          | AfrOBIS                                                  |
| 29            | 18.200    | -34.167  | Gordon's Bay, False Bay, Western Cape, South Africa.                    | AfrOBIS                                                  |
| 30            | 18.550    | -34.183  | Simonstown, False Bay, Western Cape, South Africa.                      | AfrOBIS                                                  |
| 31            | 22.150    | -34.182  | Mossel Bay, Western Cape, South Africa.                                 | AfrOBIS                                                  |
| 32            | 17.633    | -33.667  | 74 km WNW of Cape Town, South Africa.                                   | AfrOBIS                                                  |
| 33            | 18.000    | -33.800  | Blouberg Strand, Western Cape, South Africa.                            | AfrOBIS                                                  |
| 34            | 18.200    | -33.833  | Near Table Bay, Western Cape, South Africa.                             | AfrOBIS                                                  |
| 35            | 18.300    | -33.717  | Melkbosstrand, Western Cape, South Africa.                              | AfrOBIS                                                  |
| 36            | 18.417    | -33.900  | Table Bay harbor, Western Cape, South Africa.                           | AfrOBIS                                                  |
| 37            | 18.350    | -33.800  | Robben Island, Western Cape, South Africa.                              | AfrOBIS                                                  |
| 38            | 18.220    | -33.817  | Dolphin Beach, Table View, Western Cape, South Africa.                  | AfrOBIS                                                  |
| 39            | 18.150    | -33.770  | Bloubergstrand, Muisenberg, Western Cape, South Africa.                 | AfrOBIS                                                  |
| 40            | 18.300    | -33.967  | Bakoven, Western Cape, South Africa.                                    | AfrOBIS                                                  |
| 41            | 18.050    | -32.733  | St. Helena, Western Cape, South Africa.                                 | AfrOBIS                                                  |
| 42            | 18.283    | -32.083  | Lambert's Bay, Western Cape, South Africa.                              | AfrOBIS                                                  |
| 43            | 17.000    | -30.300  | Hondeklipbaai, Northern Cape, South Africa.                             | AfrOBIS                                                  |
| 45            | 20.000    | -34.840  | Agulhas Bank, South Africa.                                             | AfrOBIS                                                  |
| 46            | 18.150    | -32.633  | St. Helena Bay, Western Cape, South Africa.                             | AfrOBIS                                                  |
| 44            | 14.000    | -22.650  | Swakopmund, Erongo, Namibia.                                            | AfrOBIS                                                  |

Longitude and latitude are given in decimal degrees and negative values indicate longitudes and latitudes in Western and Southern hemispheres. INIDEP = Onboard observers database of Instituto Nacional de Investigación y Desarrollo Pesquero, Argentina. AfrOBIS = Iziko South African Museum - Fish Collection. Full citations for published records are given in References.

MaxEnt was unable to identify a single best hypothesis explaining basking shark occurrence on South Atlantic continental shelves. Several models with TSS higher than 0.5 had overlapping 95% confidence intervals (Table 2). These models were consistent with hypothesis 1 (i.e. chlorophyll is the main determinant of basking shark distribution) and 3 (i.e. both chlorophyll and temperature have an effect on basking shark distribu-

tion). However, most of these models produced inaccurate maps, for example extending the distribution of the basking shark into freshwater areas of the Río de la Plata. Of these, only model 15 (Table 2) did not predict freshwater areas as suitable habitat for basking sharks, except for a small area in the innermost Río de la Plata (Fig. 2A).

Conversely, MaxLike succeeded to identify a single

**Table 2** MaxEnt models used to test three hypotheses of determinants of the distribution of basking sharks *Cetorhinus maximus* in South Atlantic continental shelves

| Model number                                                           | Variables included in the model |          | TSS       | 95% CI |       |
|------------------------------------------------------------------------|---------------------------------|----------|-----------|--------|-------|
| <b>Hypothesis 1: Chlorophyll as the main determinant</b>               |                                 |          |           |        |       |
| 1                                                                      | chl a mean                      | oxygen   | 0.531     | 0.020  |       |
| 2                                                                      | chl a max                       | oxygen   | 0.513     | 0.023  |       |
| 3                                                                      | chl a range                     | oxygen   | 0.503     | 0.022  |       |
| 4                                                                      | chl a min                       | oxygen   | 0.493     | 0.019  |       |
| 5                                                                      | chl a min                       | salinity | 0.482     | 0.020  |       |
| 6                                                                      | chl a max                       | salinity | 0.448     | 0.023  |       |
| 7                                                                      | chl a range                     | salinity | 0.423     | 0.024  |       |
| <b>Hypothesis 2: Temperature as the main determinant</b>               |                                 |          |           |        |       |
| 8                                                                      | SST mean                        | salinity | 0.488     | 0.019  |       |
| 9                                                                      | SST min                         | salinity | 0.482     | 0.022  |       |
| 10                                                                     | SST range                       | salinity | 0.397     | 0.022  |       |
| 11                                                                     | SST max                         | salinity | 0.396     | 0.022  |       |
| <b>Hypothesis 3: Both chlorophyll and temperature are determinants</b> |                                 |          |           |        |       |
| 12                                                                     | chl a min                       | salinity | SST min   | 0.527  | 0.019 |
| 13                                                                     | chl a min                       | salinity | SST mean  | 0.522  | 0.019 |
| 14                                                                     | chl a mean                      | oxygen   | SST range | 0.515  | 0.020 |
| 15                                                                     | chl a min                       | oxygen   | SST range | 0.505  | 0.020 |
| 16                                                                     | chl a min                       | salinity | SST max   | 0.497  | 0.021 |
| 17                                                                     | chl a max                       | oxygen   | SST range | 0.487  | 0.020 |
| 18                                                                     | chl a range                     | oxygen   | SST range | 0.486  | 0.021 |
| 19                                                                     | chl a min                       | salinity | SST range | 0.485  | 0.022 |
| 20                                                                     | chl a max                       | salinity | SST mean  | 0.447  | 0.019 |
| 21                                                                     | chl a max                       | salinity | SST min   | 0.445  | 0.018 |
| 22                                                                     | chl a max                       | salinity | SST range | 0.442  | 0.020 |
| 23                                                                     | chl a range                     | salinity | SST mean  | 0.439  | 0.020 |
| 24                                                                     | chl a max                       | salinity | SST max   | 0.432  | 0.018 |
| 25                                                                     | chl a range                     | salinity | SST min   | 0.432  | 0.020 |
| 26                                                                     | chl a range                     | salinity | SST range | 0.422  | 0.022 |
| 27                                                                     | chl a range                     | salinity | SST max   | 0.404  | 0.020 |

Within each hypothesis, models are ranked according to their true skill statistic (TSS); higher values of TSS indicate better fit. The interval of its 95% confidence interval (95% CI) is also given for each model. Abbreviations for variables included are: chl a min = minimum chlorophyll concentration, chl a mean = mean chlorophyll concentration, chl a max = maximum chlorophyll concentration, chl a range = chlorophyll concentration range, SST min = minimum sea surface temperature, SST mean = mean sea surface temperature, SST max = maximum sea surface temperature, SST range = sea surface temperature range, oxygen = mean dissolved oxygen concentration, salinity = mean salinity.

best model fitting the data. This was model 35 (Table 3), which included the combined effects of chlorophyll and temperature (Hypothesis 3). This model included minimum chlorophyll concentration ( $\text{chl } a_{\min}$ ), range of sea surface temperature ( $\text{SST}_{\text{range}}$ ) and mean dissolved oxygen concentration (oxygen), and had the following parameters: intercept = 3.99,  $\text{chl } a_{\min} = 4.91$ , oxygen = 4.91,  $\text{SST}_{\text{range}} = -3.77$ ,  $\text{chl } a_{\min}^2 = -1.19$ ,  $\text{oxygen}^2 = -5.44$ ,  $\text{oxygen}^3 = 3.05$ . In addition, this model had also a better fit than any MaxEnt model; it had the highest TSS value: 0.573 (95% confidence interval = 0.018) and explained 30.9% of the deviance. Therefore, we concluded that MaxLike model 35 was the best for describing the geographic distribution of basking sharks on South Atlantic continental shelves.

Variables  $\text{chl } a_{\min}$ , oxygen and  $\text{SST}_{\text{range}}$  did not contribute equally to the final model. The most important variable was  $\text{chl } a_{\min}$ , with a  $w$  of 0.616, followed by oxygen ( $w = 0.551$ ), and  $\text{SST}_{\text{range}}$  ( $w = 0.100$ ).

Both the best MaxEnt and MaxLike models agreed in the general extent of the basking shark range on South Atlantic continental shelves. However, the best MaxEnt

model predicted a more widespread and continuous range for basking sharks than the best MaxLike model (Fig. 2A, B; Fig. 3A, B).

Based on the best MaxLike model the highest probability of occurrence of basking sharks were, generally, confined to areas south of 20°S on both sides of the Atlantic. Off South America, the highest probabilities of occurrence of basking sharks were located off southern Brazil, between Espírito Santo and Cabo de Santa Marta Grande (i.e. 20 to 28°S), off Uruguay and the Río de la Plata mouth up north to approximately 31°S, the northern Patagonian gulfs, the eastern mouth of the Strait of Magellan, and off the Malvinas/Falkland Islands (Fig. 3A). Off Africa, the highest probabilities of occurrence were located in an area ranging from off northern Namibia (just south of the Namibia-Angola border at about 20°S) to East London, Eastern Cape, South Africa, at 33°S (Fig. 3B).

Our model predictions using a threshold of 0.252 indicated that, on South Atlantic continental shelves, basking sharks inhabited cool-temperate to subtropical waters (Fig. 3). In the southwest Atlantic, basking

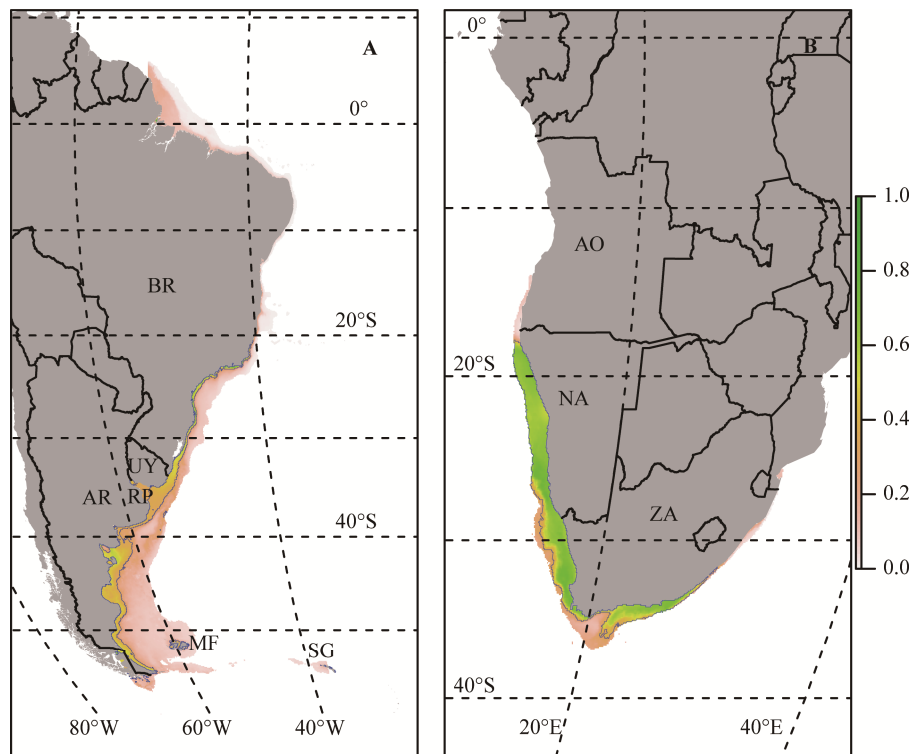

**Fig. 2** Habitat suitability (from 0, lowest suitability, to 1, highest suitability) for basking sharks *Cetorhinus maximus* as estimated from a maximum entropy (MaxEnt) model including chlorophyll minimum concentration, mean dissolved oxygen concentration, and sea surface temperature range

**A.** Continental shelves off South America. **B.** Continental shelves of southern Africa. The blue line delimits the geographic range, estimating after applying a threshold maximizing the sum of specificity and sensitivity. AO = Angola, AR = Argentina, BR = Brazil, MF = Malvinas/Falkland Islands, NA = Namibia, RP = Río de la Plata, SG = South Georgia, UY = Uruguay, ZA = South Africa. Map projection is Mollweide equal area.

**Table 3** MaxLike models used to test three hypotheses of determinants of the distribution of basking sharks *Cetorhinus maximus* in South Atlantic continental shelves

| Model number                                                           | Variables included in the model                                                               | AIC            | BIC            |
|------------------------------------------------------------------------|-----------------------------------------------------------------------------------------------|----------------|----------------|
| <b>Hypothesis 1: Chlorophyll as the main determinant</b>               |                                                                                               |                |                |
| 1                                                                      | chl a min + salinity + chl a min2 + salinity2 + chl a min3                                    | 896.373        | 905.516        |
| 2                                                                      | chl a min + salinity + chl a min2 + salinity2 + chl a min3 + salinity3                        | 898.330        | 909.301        |
| 3                                                                      | int + chl a min + salinity + chl a min2 + salinity2 + chl a min3 + salinity3                  | 900.287        | 913.088        |
| 4                                                                      | chl a mean + oxygen + chl a mean2 + oxygen2 + oxygen3                                         | 900.829        | 909.973        |
| 5                                                                      | int + chl a mean + oxygen + chl a mean2 + oxygen2 + oxygen3                                   | 902.469        | 913.441        |
| 6                                                                      | int + chl a min + oxygen + chl a min2 + chl a min3 + oxygen3                                  | 907.383        | 918.354        |
| 7                                                                      | int + chl a max + oxygen + oxygen2 + chl a max3 + oxygen3                                     | 907.434        | 918.406        |
| 8                                                                      | int + chl a max + oxygen + chl a max2 + oxygen2 + chl a max3 + oxygen3                        | 908.425        | 921.226        |
| 9                                                                      | int + chl a min + oxygen + chl a min2 + oxygen2 + chl a min3 + oxygen3                        | 908.812        | 921.612        |
| 10                                                                     | int + oxygen + chl a range2 + oxygen2 + chl a range3 + oxygen3                                | 910.735        | 921.707        |
| 11                                                                     | int + chl a range + oxygen + chl a range2 + oxygen2 + chl a range3 + oxygen3                  | 916.345        | 929.145        |
| 12                                                                     | int + chl a range + salinity + chl a range3 + salinity3                                       | 936.007        | 945.150        |
| 13                                                                     | int + chl a range + salinity + salinity2 + chl a range3 + salinity3                           | 937.217        | 948.189        |
| 14                                                                     | int + salinity + chl a max3 + salinity3                                                       | 937.256        | 944.570        |
| 15                                                                     | int + salinity + salinity2 + chl a max3 + salinity3                                           | 938.554        | 947.697        |
| 16                                                                     | int + chl a range + salinity + chl a range2 + salinity2 + chl a range3 + salinity3            | 938.982        | 951.783        |
| 17                                                                     | int + chl a max + salinity + salinity2 + chl a max3 + salinity3                               | 939.720        | 950.692        |
| 18                                                                     | int + chl a max + salinity + chl a max2 + salinity2 + chl a max3 + salinity3                  | 941.569        | 954.369        |
| 19                                                                     | int + chl a mean + oxygen + chl a mean2 + oxygen2 + chl a mean3 + oxygen3                     | 943.252        | 956.053        |
| <b>Hypothesis 2: Temperature as the main determinant</b>               |                                                                                               |                |                |
| 20                                                                     | salinity + SST min2                                                                           | 922.513        | 926.170        |
| 21                                                                     | SST mean + salinity + SST mean2 + SST mean3                                                   | 922.781        | 930.096        |
| 22                                                                     | SST mean + salinity + SST mean2 + salinity2 + SST mean3                                       | 923.853        | 932.996        |
| 23                                                                     | salinity + SST min2 + salinity2 + SST min3                                                    | 924.655        | 931.970        |
| 24                                                                     | int + salinity + SST min2 + salinity2 + SST min3                                              | 925.484        | 934.627        |
| 25                                                                     | int + salinity + SST min2 + salinity2 + SST min3 + salinity3                                  | 925.645        | 936.617        |
| 26                                                                     | int + SST mean + salinity + SST mean2 + salinity2 + SST mean3                                 | 925.850        | 936.822        |
| 27                                                                     | int + SST min + salinity + SST min2 + salinity2 + SST min3 + salinity3                        | 927.618        | 940.418        |
| 28                                                                     | SST max + salinity + SST max2 + salinity2 + SST max3                                          | 932.927        | 942.070        |
| 29                                                                     | int + SST mean + salinity + SST mean2 + salinity2 + SST mean3 + salinity3                     | 934.770        | 947.570        |
| 30                                                                     | SST max + salinity + SST max2 + salinity2 + SST max3 + salinity3                              | 938.599        | 949.570        |
| 31                                                                     | int + SST max + salinity + SST max2 + salinity2 + SST max3 + salinity3                        | 943.413        | 956.213        |
| 32                                                                     | int + salinity + salinity2 + SST range3 + salinity3                                           | 944.087        | 953.230        |
| 33                                                                     | int + SST range + salinity + salinity2 + SST range3 + salinity3                               | 946.080        | 957.052        |
| 34                                                                     | int + SST range + salinity + SST range2 + salinity2 + SST range3 + salinity3                  | 948.076        | 960.877        |
| <b>Hypothesis 3: Both chlorophyll and temperature are determinants</b> |                                                                                               |                |                |
| <b>35</b>                                                              | <b>int + chl a min + oxygen + SST range + chl a min2 + oxygen2 + oxygen3</b>                  | <b>890.419</b> | <b>903.219</b> |
| 36                                                                     | chl a min + SST min + chl a min2 + salinity2 + chl a min3 + SST min3                          | 891.100        | 903.900        |
| 37                                                                     | chl a range + oxygen + chl a range2 + oxygen2 + SST range2 + oxygen3 + chl a range: SST range | 891.204        | 904.004        |
| 38                                                                     | chl a min + SST min + chl a min2 + salinity2 + chl a min3 + salinity3 + SST min3              | 891.882        | 904.683        |
| 39                                                                     | int + chl a min + oxygen + SST range + chl a min2 + oxygen2 + chl a min3 + oxygen3            | 891.957        | 906.586        |
| 40                                                                     | int + chl a max + SST min + chl a max2 + salinity2 + SST min3                                 | 892.664        | 903.635        |



Continued Table 3

| Model number | Variables included in the model                                                                                                           | AIC     | BIC     |
|--------------|-------------------------------------------------------------------------------------------------------------------------------------------|---------|---------|
| 41           | chl a range + oxygen + chl a range2 + oxygen2 + SST range2 + chl a range3 + oxygen3 + chl a range: SST range                              | 892.756 | 907.385 |
| 42           | int + chl a max + oxygen + chl a max2 + oxygen2 + SST range2 + chl a max3 + oxygen3 + chl a max: SST range                                | 892.809 | 909.267 |
| 43           | int + chl a min + SST min + chl a min2 + salinity2 + chl a min3 + salinity3 + SST min3                                                    | 892.996 | 907.625 |
| 44           | int + chl a min + oxygen + SST range + chl a min2 + oxygen2 + SST range2 + chl a min3 + oxygen3                                           | 893.232 | 907.862 |
| 45           | int + chl a max + SST min + chl a max2 + salinity2 + SST min2 + SST min3                                                                  | 893.416 | 906.216 |
| 46           | int + chl a min + oxygen + SST range + chl a min2 + oxygen2 + SST range2 + chl a min3 + oxygen3 + chl a min: SST range                    | 893.485 | 911.771 |
| 47           | int + chl a min + SST min + chl a min2 + salinity2 + chl a min3 + salinity3 + SST min3 + chl a min: SST min                               | 894.580 | 911.038 |
| 48           | int + chl a max + oxygen + chl a max2 + oxygen2 + SST range2 + chl a max3 + oxygen3 + SST range3 + chl a max: SST range                   | 894.761 | 913.048 |
| 49           | int + chl a max + SST min + chl a max2 + salinity2 + SST min2 + SST min3 + chl a max: SST min                                             | 895.012 | 909.641 |
| 50           | int + chl a range + SST min + salinity2 + SST min2 + chl a range3 + SST min3                                                              | 895.078 | 907.878 |
| 51           | chl a min + salinity + chl a min2 + salinity2 + chl a min3 + SST mean3                                                                    | 895.956 | 906.928 |
| 52           | int + chl a mean + oxygen + SST range + chl a mean2 + oxygen2 + oxygen3                                                                   | 896.135 | 908.935 |
| 53           | chl a min + salinity + chl a min2 + salinity2 + SST mean2 + chl a min3 + SST mean3                                                        | 896.197 | 908.998 |
| 54           | int + chl a mean + oxygen + SST range + chl a mean2 + oxygen2 + SST range2 + oxygen3                                                      | 896.317 | 910.946 |
| 55           | chl a min + salinity + chl a min2 + salinity2 + chl a min3                                                                                | 896.373 | 911.002 |
| 56           | int + chl a max + oxygen + SST range + chl a max2 + oxygen2 + SST range2 + chl a max3 + oxygen3 + SST range3 + chl a max: SST range       | 896.415 | 916.530 |
| 57           | int + chl a min + salinity + SST min + chl a min2 + salinity2 + chl a min3 + salinity3 + SST min3 + chl a min: SST min                    | 896.491 | 914.778 |
| 58           | int + chl a max + salinity + SST min + chl a max2 + salinity2 + SST min2 + SST min3 + chl a max: SST min                                  | 896.734 | 913.192 |
| 59           | chl a min + salinity + chl a min2 + salinity2 + SST range2 + chl a min3                                                                   | 896.758 | 907.730 |
| 60           | int + chl a range + SST min + chl a range2 + salinity2 + SST min2 + chl a range3 + SST min3                                               | 897.079 | 911.709 |
| 61           | int + chl a mean + oxygen + SST range + chl a mean2 + oxygen2 + SST range2 + chl a mean3 + oxygen3                                        | 897.134 | 913.592 |
| 62           | chl a min + salinity + SST mean + chl a min2 + salinity2 + SST mean2 + chl a min3 + SST mean3                                             | 897.348 | 911.977 |
| 63           | int + chl a min + oxygen + SST range + chl a min2 + oxygen2 + SST range2 + chl a min3 + oxygen3 + SST range3 + chl a min: SST range       | 897.615 | 917.730 |
| 64           | int + chl a min + salinity + SST min + chl a min2 + salinity2 + SST min2 + chl a min3 + salinity3 + SST min3 + chl a min: SST min         | 898.422 | 918.537 |
| 65           | int + chl a min + salinity + chl a min2 + salinity2 + SST range2 + chl a min3                                                             | 898.491 | 911.292 |
| 66           | int + chl a range + SST min + chl a range2 + salinity2 + SST min2 + chl a range3 + salinity3 + SST min3                                   | 898.648 | 915.105 |
| 67           | int + chl a max + salinity + SST min + chl a max2 + salinity2 + SST min2 + salinity3 + SST min3 + chl a max: SST min                      | 898.705 | 916.991 |
| 68           | int + chl a mean + oxygen + SST range + chl a mean2 + oxygen2 + SST range2 + chl a mean3 + oxygen3 + chl a mean: SST range                | 898.914 | 917.201 |
| 69           | chl a min + salinity + SST mean + chl a min2 + salinity2 + SST mean2 + chl a min3 + SST mean3 + chl a min: SST mean                       | 899.150 | 915.607 |
| 70           | int + chl a range + oxygen + chl a range2 + oxygen2 + SST range2 + chl a range3 + oxygen3 + chl a range: SST range                        | 899.770 | 916.227 |
| 71           | int + chl a min + salinity + chl a min2 + salinity2 + SST range2 + chl a min3 + chl a min: SST range                                      | 899.842 | 914.471 |
| 72           | int + chl a range + SST min + chl a range2 + salinity2 + SST min2 + chl a range3 + salinity3 + SST min3 + chl a range: SST min            | 900.244 | 918.530 |
| 73           | int + chl a max + salinity + SST min + chl a max2 + salinity2 + SST min2 + chl a max3 + salinity3 + SST min3 + chl a max: SST min         | 900.706 | 920.821 |
| 74           | int + chl a mean + oxygen + SST range + chl a mean2 + oxygen2 + SST range2 + chl a mean3 + oxygen3 + SST range3 + chl a mean: SST range   | 900.887 | 921.002 |
| 75           | chl a min + salinity + SST mean + chl a min2 + salinity2 + SST mean2 + chl a min3 + salinity3 + SST mean3 + chl a min: SST mean           | 901.059 | 919.346 |
| 76           | int + chl a min + salinity + chl a min2 + salinity2 + SST range2 + chl a min3 + SST range3 + chl a min: SST range                         | 901.558 | 918.015 |
| 77           | int + chl a range + oxygen + SST range + chl a range2 + oxygen2 + SST range2 + chl a range3 + oxygen3 + chl a range: SST range            | 901.596 | 919.882 |
| 78           | int + chl a range + salinity + SST min + chl a range2 + salinity2 + SST min2 + chl a range3 + salinity3 + SST min3 + chl a range: SST min | 902.171 | 922.286 |
| 79           | int + chl a min + salinity + chl a min2 + salinity2 + SST range2 + chl a min3 + salinity3 + SST range3 + chl a min: SST range             | 902.467 | 920.754 |

Continued Table 3

| Model number | Variables included in the model                                                                                                                   | AIC     | BIC     |
|--------------|---------------------------------------------------------------------------------------------------------------------------------------------------|---------|---------|
| 80           | int + chl a min + salinity + SST mean + chl a min2 + salinity2 + SST mean2 + chl a min3 + salinity3 + SST mean3 + chl a min: SST mean             | 903.027 | 923.142 |
| 81           | int + chl a range + oxygen + SST range + chl a range2 + oxygen2 + SST range2 + chl a range3 + oxygen3 + SST range3 + chl a range: SST range       | 903.530 | 923.645 |
| 82           | int + chl a min + salinity + SST range + chl a min2 + salinity2 + SST range2 + chl a min3 + salinity3 + SST range3 + chl a min: SST range         | 903.784 | 923.899 |
| 83           | int + SST mean + salinity2 + SST mean2 + chl a max3 + salinity3 + SST mean3 + chl a max: SST mean                                                 | 908.564 | 923.193 |
| 84           | int + chl a min + salinity + SST max + chl a min2 + salinity2 + SST max2 + chl a min3 + salinity3 + SST max3 + chl a min: SST max                 | 909.175 | 929.290 |
| 85           | int + chl a max + SST mean + salinity2 + SST mean2 + chl a max3 + salinity3 + SST mean3 + chl a max: SST mean                                     | 911.463 | 927.921 |
| 86           | int + chl a range + salinity + SST mean + salinity2 + SST mean2 + chl a range3 + salinity3 + SST mean3 + chl a range: SST mean                    | 911.535 | 929.822 |
| 87           | int + chl a range + salinity + salinity2 + SST range2 + salinity3 + SST range3 + chl a range: SST range                                           | 912.149 | 926.778 |
| 88           | int + chl a range + salinity + salinity2 + SST range2 + chl a range3 + salinity3 + SST range3 + chl a range: SST range                            | 912.745 | 929.203 |
| 89           | int + chl a range + salinity + chl a range2 + salinity2 + SST range2 + chl a range3 + salinity3 + SST range3 + chl a range: SST range             | 913.572 | 931.859 |
| 90           | int + chl a range + salinity + SST range + chl a range2 + salinity2 + SST range2 + chl a range3 + salinity3 + SST range3 + chl a range: SST range | 914.801 | 934.916 |
| 91           | int + chl a max + salinity + chl a max2 + salinity2 + SST range2 + salinity3 + SST range3 + chl a max: SST range                                  | 916.915 | 933.373 |
| 92           | int + chl a max + salinity + SST range + chl a max2 + salinity2 + SST range2 + salinity3 + SST range3 + chl a max: SST range                      | 919.948 | 938.234 |
| 93           | int + chl a max + salinity + SST range + chl a max2 + salinity2 + SST range2 + chl a max3 + salinity3 + SST range3 + chl a max: SST range         | 921.665 | 941.780 |
| 94           | int + chl a max + salinity + SST max + salinity2 + SST max2 + chl a max3 + salinity3 + SST max3 + chl a max: SST max                              | 921.847 | 940.133 |
| 95           | int + chl a range + salinity + SST max + chl a range2 + salinity2 + SST max2 + chl a range3 + SST max3                                            | 926.692 | 943.150 |
| 96           | int + chl a range + salinity + SST max + chl a range2 + salinity2 + SST max2 + chl a range3 + SST max3 + chl a range: SST max                     | 927.634 | 945.921 |
| 97           | int + chl a range + salinity + SST mean + chl a range2 + salinity2 + SST mean2 + chl a range3 + salinity3 + SST mean3 + chl a range: SST mean     | 928.686 | 948.801 |
| 98           | int + chl a range + salinity + SST max + chl a range2 + salinity2 + SST max2 + chl a range3 + salinity3 + SST max3 + chl a range: SST max         | 929.622 | 949.737 |
| 99           | int + chl a max + salinity + SST mean + salinity2 + SST mean2 + chl a max3 + salinity3 + SST mean3 + chl a max: SST mean                          | 932.518 | 950.804 |
| 100          | int + chl a max + salinity + SST mean + chl a max2 + salinity2 + SST mean2 + chl a max3 + salinity3 + SST mean3 + chl a max: SST mean             | 934.512 | 954.627 |
| 101          | int + chl a max + salinity + SST max + chl a max2 + salinity2 + SST max2 + chl a max3 + salinity3 + SST max3 + chl a max: SST max                 | 939.254 | 959.369 |

Within each hypothesis, models are ranked according to their Akaike Information Criterion (AIC); lower values of AIC indicate a better fit. Bayesian Information Criterion (BIC) is also given. The best model is shown in bold. Abbreviations for variables included are: chl a min = minimum chlorophyll concentration, chl a mean = mean chlorophyll concentration, chl a max = maximum chlorophyll concentration, chl a range = chlorophyll concentration range, SST min = minimum sea surface temperature, SST mean = mean sea surface temperature, SST max = maximum sea surface temperature, SST range = sea surface temperature range, oxygen = mean dissolved oxygen concentration, salinity = mean salinity. Variable names numbered 2 and 3 mean that variable to the second or third power, respectively.

sharks occurred on continental shelves from off Tierra del Fuego (Argentina) to about 20°S (Brazil), including Uruguay's eastern shore and coastal waters of the Malvinas/Falkland Islands. The model also indicated a few scattered locations suitable for basking shark occurrence in coastal waters of South Georgia (Fig. 3A). In the southeast Atlantic, basking sharks inhabited the cool waters from off southern South Africa to northern Namibia, and were absent in the subtropical waters off northeastern South Africa, and in tropical waters off southern Angola (Fig. 3B). Unlike the southeast Atlantic range, the southwest Atlantic range of basking sharks

comprised cool temperate, warm temperate and subtropical waters.

### 3 Discussion

We found support for an effect of both chlorophyll minimum concentration and sea surface temperature range in determining the distribution of basking sharks on South Atlantic continental shelves. However, of all three variables included in the best model, chlorophyll minimum concentration had the highest contribution. We propose that the importance of chlorophyll minimum concentration on basking shark distribution likely

reflects a positive correlation with phytoplankton abundance, which in turn affects the abundance of the zooplanktonic prey of basking sharks. A positive correlation of chlorophyll concentration and zooplankton abundance at large scales has been observed before (Irigoién et al., 2004; Ware and Thomson, 2005). In the study area, sectors of high zooplankton abundance coincide with areas of high phytoplankton abundance, as estimated by chlorophyll concentration (Verheye 2000; Sabatini and Álvarez Colombo, 2001; Acha et al., 2004). Our finding agrees with results at smaller scales, where zooplankton concentration is a major determinant of basking shark occurrence and abundance (Sims et al., 1997, 2003; Sims and Quayle, 1998; Soldo et al., 2008; Siders et al., 2013). The results of our model likely reflect the distribution of concentrations of basking sharks, which are generally located in areas with high food availability (Sims, 2008; Siders et al., 2013).

Evidence is increasing that dissolved oxygen concentration plays an important role in determining the distribution of large sharks. It is not surprising that dissolved oxygen concentration could limit the vertical and

horizontal distribution of endothermic sharks, which have high metabolic rates and oxygen demands, such as shortfin mako *Isurus oxyrinchus* (Abascal et al., 2011), and white sharks *Carcharodon carcharias* (Nasby-Lucas et al., 2009), but it also has a large effect on ectothermic species, such as the bull shark *Carcharhinus leucas* (Heithaus et al., 2009). We hypothesize that the importance of dissolved oxygen as a determinant of the distribution of basking sharks on South Atlantic continental shelves reflects the importance of frontal, well oxygenated systems as primary habitat for this species.

We have confirmed the geographic distribution of basking sharks on southern African continental shelves and shown that the subtropical South American continental shelf between 20°S and 30°S is (or was) an area of regular occurrence of basking sharks, not previously included in any map. Compagno (1984) depicts a map where basking sharks occur in the South Atlantic south of 30°S, restricted on continental shelves on both sides of the Atlantic. Later, Compagno (2001) extends north the African range of basking sharks to 20°S, along the Namibian coast, and includes the open ocean between

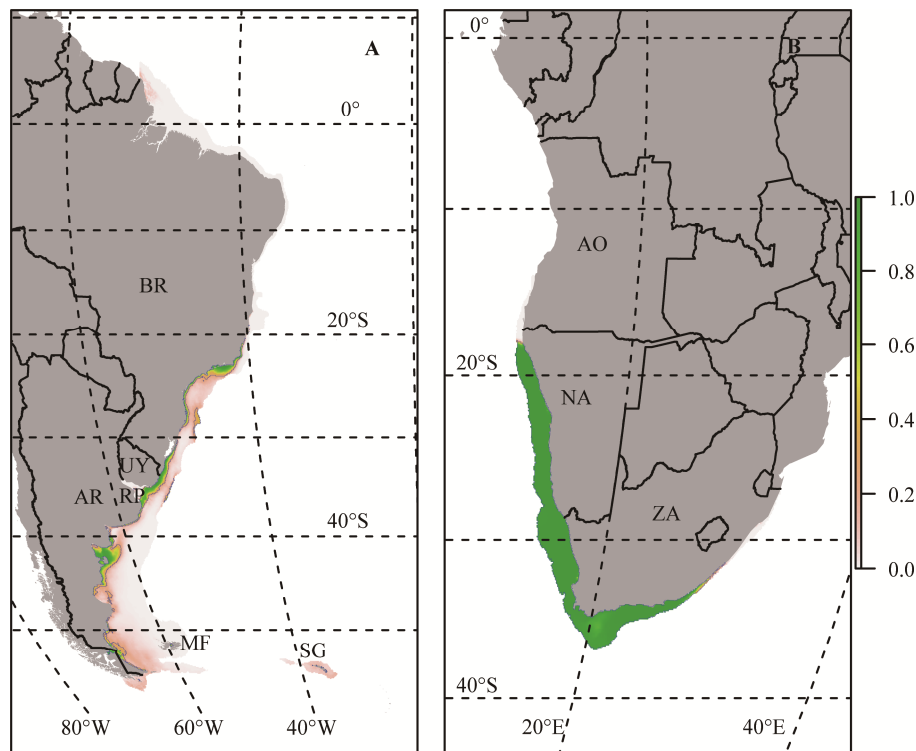

**Fig. 3** Habitat suitability (from 0, lowest suitability, to 1, highest suitability) for basking sharks *Cetorhinus maximus* as estimated from a maximum likelihood (MaxLike) model including chlorophyll minimum concentration, mean dissolved oxygen concentration, and sea surface temperature range

**A.** Continental shelves off South America. **B.** Continental shelves of southern Africa. The blue line delimits the geographic range, estimating after applying a threshold maximizing the sum of specificity and sensitivity. AO = Angola, AR = Argentina, BR = Brazil, MF = Malvinas/Falkland Islands, NA = Namibia, RP = Río de la Plata, SG = South Georgia, UY = Uruguay, ZA = South Africa. Map projection is Mollweide equal area.

South America and Africa between 30°S and 50°S in the west and 20°S and 40°S in the east, as a potential area of occurrence of basking sharks. More recently, Ebert et al. (2013) show a map keeping essentially the same limits of the distribution of basking sharks on South Atlantic continental shelves as Compagno (2001); although they extend the distribution to oceanic waters between Africa and South America.

Eastern (i.e. African) and western (i.e. South American) parts of the South Atlantic geographic range of basking sharks are dissimilar in their habitat suitability. The southwest African shelf appears to have higher and more continuous habitat suitability than the South American shelf. This could be a result of both the high oceanographic heterogeneity of the South American shelf (Acha et al., 2004) and the extremely high productivity (second in the world) of the southwest African shelf (Waldron and Probyn, 1992). South American continental shelves include a mosaic of areas of high productivity scattered among areas of lower primary and secondary production (Acha et al., 2004). On the other hand, on the southwest African shelf, areas of high productivity are more homogeneously distributed, forming a vast frontal system – the Benguela system. Given the importance of primary production in determining basking shark distribution in the South Atlantic, it is expected a more continuous habitat suitability on the southern African shelf than off South America.

The geographic range of basking sharks on South Atlantic shelves has some marked differences with the distribution on North Atlantic shelves. In the North Atlantic outside the Gulf of Mexico, basking sharks occur mainly in high latitudes (Compagno, 2001), wandering into subtropical shelf waters (e.g. east coast of Florida, USA) only occasionally (Compagno, 2001; Compagno et al., 2005). However, regular occurrence of basking sharks in subtropical shelf waters appears to be a common pattern in some areas, like off Fujian (China), where basking sharks were common enough as to support a harpoon fishery (Lam and Sadovy de Mitcheson, 2011), and off northwestern Florida, where repeated interannual sightings of basking sharks have been reported (Hoffmayer et al., 2011). The situation off Fujian resembles the case off southern Brazil, where basking sharks used to be common and its occurrence as predictable as to support small-scale gillnet fisheries (Soto et al., 2007). Minimum chlorophyll concentration is a major driver explaining the presence of basking sharks in southern Brazilian subtropical waters, as compared to eastern Florida or KwaZulu-Natal (South Africa) waters.

From the Bio-ORACLE database (Tyberghein et al., 2012), minimum chlorophyll concentration is about an order of magnitude higher off southern Brazil than off eastern Florida (Table 4). Interestingly, minimum chlorophyll concentration off Fujian and off northwestern Florida – the other subtropical areas with a known regular occurrence of basking sharks – is similar to the one off southern Brazil (Table 4). Waters off KwaZulu-Natal – the subtropical area within our study area with zero basking shark occurrences – have a minimum chlorophyll concentration lower than those off southern Brazil, Fujian, or northwestern Florida (Table 4). Thus, we propose that the regular presence of basking sharks in subtropical shelf waters is limited by food (zooplankton) availability. In fact, a positive association of food availability and abundance or occurrence has been reported in basking sharks (Sims et al., 1997; Sims and Reid, 2002; Siders et al., 2013) and other planktivorous elasmobranchs (e.g. Anderson et al., 2011; Jaime et al., 2012; McKinney et al., 2012).

In general, the most suitable habitats for basking sharks on South Atlantic continental shelves coincide with the northward branches of the Antarctic Circumpolar Current, which produce upwelling areas rich in zooplankton and dissolved oxygen, and with steep horizontal gradients in sea surface temperature. The highest habitat suitability for basking sharks are located in frontal systems, such as the Benguela upwelling off western South Africa and Namibia, the upwelling areas off Cabo Frio and Cabo de Santa Marta Grande off southern Brazil, the Río de la Plata estuary front and the shelf-break front off northern Argentina and Uruguay, the tidal front off the northern Patagonian gulfs, and the Patagonian cold estuarine front off the mouth of the Strait of Magellan. Fronts increase primary production by re-suspending nutrients in the euphotic zone, increasing zooplankton concentration (Muelbert et al., 2008),

**Table 4** Minimum chlorophyll a concentration ( $\text{mg}/\text{m}^3$ ) median and interquartile range values for five subtropical regions with different sighting frequency of basking sharks *Cetorhinus maximus*

| Region               | Median | Interquartile range |
|----------------------|--------|---------------------|
| northwestern Florida | 0.546  | 0.329–2.786         |
| southern Brazil      | 0.534  | 0.282–1.207         |
| Fujian               | 0.402  | 0.195–0.828         |
| KwaZulu-Natal        | 0.152  | 0.133–0.344         |
| eastern Florida      | 0.064  | 0.053–0.099         |

Data taken from the Bio-ORACLE database (Tyberghein et al., 2012).

which, in turn, increases the abundance of predators (Etnoyer et al., 2004; Royer et al., 2004; Campagna et al., 2006). Among elasmobranchs, it is well known that the abundance of both zooplankton feeders (Sims and Quayle, 1998; Luiz Jr. et al., 2009; McKinney et al., 2012) and higher-level predators (Campana and Joyce, 2004; Weltz et al., 2013) increases at fronts, making these areas hotspots of species richness (Worm et al., 2003; Lucifora et al., 2012). The congruence of the areas of highest habitat suitability for basking sharks and the location of marine fronts agree with previous observations of marine fronts as important habitats for basking sharks (Choy and Adams, 1995; Sims and Quayle, 1998; Hoffmayer et al., 2011).

Copepods and large planktonic crustaceans are the main components of the basking shark diet (Compagno, 2001; Sims, 2008). Accordingly, foraging areas of basking sharks are characterized by a predominance of these prey, particularly copepods (Sims and Merrett, 1997). Copepods are the most abundant zooplankton in frontal areas off southern Brazil (Montú et al., 1997; Lopes et al., 1999; Muelbert et al., 2008), and off Argentina (Sabatini and Álvarez Colombo, 2001; Acha et al., 2004), as well as off southwest Africa (Verheye et al., 1998). This indicates that the zooplankton community of the areas identified as suitable habitat for basking shark in the South Atlantic contains the most important prey groups for basking sharks.

The best model predicts that basking sharks might occur both in areas with historical basking shark records but without precise data, and in areas lacking any previous record of basking sharks. One of these areas is the eastern Uruguayan coast. Although we were not able to obtain the precise locations of basking shark occurrences in this area, these sharks are known to occur off eastern Uruguay (de Buen, 1950), where they are occasionally caught in gillnet fisheries (Domingo et al., 2008). Accordingly, our model predicts the occurrence of basking sharks in the same area where the species has been recorded along the Uruguayan coasts. Other areas in which the model predicts suitable habitat for basking sharks but no actual records have been confirmed include a few scattered coastal areas of South Georgia. Basking sharks have not been recorded around South Georgia waters (Duhamel and Compagno, 1985; Compagno, 1984, 2001; Ebert et al., 2013). However, the presence of basking sharks in high-latitude areas in the Northern Hemisphere (e.g. Barents Sea, White Sea) and the frequency of other commonly co-occurring species in South Georgia (e.g. porbeagle sharks, *Lamna nasus*)

(Duhamel and Compagno, 1985; Figueroa, 1997) suggest that the habitat suitability predicted by the model may be correct. The current absence of basking sharks around South Georgia may be a result of lack of data or an actual absence due to the remoteness of this area.

There are some potential issues that might affect or limit our results. First, the opportunistic nature of our records is an obstacle that impedes the use of stronger presence-absence modelling frameworks. Modelling techniques incorporating presences and absences are known to perform better than presence-background techniques (Brotons et al., 2004). Thus, these techniques are preferred when standardized surveys are available (Brotons et al., 2004). In our case, our sources of data were records from museum collections, fishery catches and fishery observer programs. The only way of amalgamating all these records is through presence-background modelling techniques, such as those used here, which have performances close to presence-absence techniques (MacLeod et al., 2008; Royle et al., 2012), as has been done previously for basking (Siders et al., 2013) and other sharks (McKinney et al., 2012; Sequeira et al., 2012). Second, the available records had a distribution biased to coastal waters, while it is known that basking sharks spend considerable amounts of time in the open ocean at mesopelagic depths (Skomal et al., 2009). We addressed this problem by limiting our analyses to continental shelf waters. Also, our results identify offshore areas as suitable habitat for basking sharks despite most records being close to shore. This suggests that, within the neritic realm, our results could be unbiased. However, much remains to be done concerning the distribution of basking sharks in open waters of the South Atlantic Ocean.

The areas identified as most suitable for basking sharks are close to shore and in highly productive areas (fronts). Nearshore marine habitats are more affected by anthropogenic effects (e.g. pollution, habitat destruction, fishing) than offshore areas (Halpern et al., 2008). Highly productive South Atlantic marine fronts tend to accumulate fish biomass, which makes them a target of commercial fisheries (Sakko, 1998; Tyedmers et al., 2005; Lucifora et al., 2012; Alemany, 2013). Hence, in these areas basking sharks are exposed to high anthropogenic impacts. Basking sharks appear to be highly vulnerable to even low levels of human-induced mortality (Sims, 2008). Thus, regulation of fishing methods known to affect basking sharks must be monitored in areas containing suitable habitat for this species. Also, fishing crews could be instructed on the most appropri-

ate ways of releasing basking sharks caught incidentally, although the success of such a measure will depend on post-release survival.

We have shown how habitat suitability modelling may inform about the geographic distribution of a threatened shark in a large area with little available information. Our model explains why basking sharks occur regularly in some subtropical shelf areas (e.g. southern Brazil, Fujian, northwest Florida) while being absent in other subtropical regions (i.e. east Florida, KwaZulu-Natal), and predicts the presence of basking sharks in areas with known occurrences of the species but no precise data (i.e. Uruguay east coast). Our results provide quantitative evidence of habitat suitability useful for historical baseline estimation, conservation and recovery planning.

**Acknowledgements** We thank M. C. Oddone, H. L. López and A. Mones for providing us with some bibliographic references. We also thank five anonymous referees and Francesco Ferretti whose comments greatly improved this manuscript.

## References

- Abascal FJ, Quintans M, Ramos-Cartelle A, Mejuto J, 2011. Movements and environmental preferences of the shortfin mako *Isurus oxyrinchus* in the southeastern Pacific Ocean. *Mar. Biol.* 158: 1175–1184.
- Acha EM, Mianzan HW, Guerrero RA, Favero M, Bava J, 2004. Marine fronts at the continental shelves of austral South America: Physical and ecological processes. *J. Mar. Systems* 44: 83–105.
- Aleman D, 2013. Importancia de sistemas frontales del Mar Argentino sobre la distribución y abundancia de peces de la plataforma continental. PhD Thesis, Universidad Nacional de Mar del Plata, Mar del Plata.
- Allouche O, Tsoar A, Kadmon R, 2006. Assessing the accuracy of species distribution models: Prevalence, kappa and the true skill statistic (TSS). *J. Appl. Ecol.* 43: 1223–1232.
- Anderson RC, Adam MS, Goes JI, 2011. From monsoons to mantas: Seasonal distribution of *Manta alfredi* in the Maldives. *Fish. Oceanogr.* 20: 104–113.
- Bonfil R, Meyer M, Scholl MC, Johnson R, O'Brien S et al., 2005. Transoceanic migration, spatial dynamics, and population linkages of white sharks. *Science* 310: 100–103.
- Brotons L, Thuiller W, Araújo MB, Hirzel AH, 2004. Presence-absence versus presence-only modelling methods for predicting bird habitat suitability. *Ecography* 27: 437–448.
- Campagna C, Piola AR, Marin MR, Lewis M, Fernández T, 2006. Southern elephant seal trajectories, fronts and eddies in the Brazil/Malvinas Confluence. *Deep-Sea Res. I* 53: 1907–1924.
- Campana SE, Joyce WN, 2004. Temperature and depth associations of porbeagle sharks *Lamna nasus* in the northwest Atlantic. *Fish. Oceanogr.* 13: 52–64.
- Choy BK, Adams DH, 1995. An observation of a basking shark *Cetorhinus maximus* feeding along a thermal front off the east central coast of Florida. *Florida Sci.* 58: 313–319.
- Clarke S, 2004. Shark product Trade in Hong Kong and Mainland China and Implementation of the CITES shark Listings. Hong Kong: TRAFFIC East Asia.
- Compagno LJV, 1984. FAO species catalogue. Vol. 4. Sharks of the world: An annotated and illustrated catalogue of shark species known to date. Part 1. Hexanchiformes to Lamniformes. FAO Fisheries Synopses 125 (Vol. 4) Part 1: 1–249.
- Compagno LJV, 2001. Sharks of the World: An Annotated and Illustrated Catalogue of Shark Species Known to Date. Vol. 2. Bullhead, Mackerel and carpet Sharks (Heterodontiformes, Lamniformes and Orectolobiformes). FAO Species Catalogue for Fishery Purposes. No. 1, Vol. 2. Rome: FAO.
- Compagno LJV, Ebert DA, Smale MMJ, 1989. Guide to the Sharks and Rays of Southern Africa. Cape Town: Struik.
- Compagno LJV, Last PR, Stevens JD, Alava MNR, 2005. Checklist of Philippine Chondrichthyes. CSIRO Mar. Lab. Rep. 243: 1–103.
- Cortés F, Jaureguizar AJ, Menni RC, Guerrero RA, 2011. Ontogenetic habitat preferences of the narrownose smooth-hound shark *Mustelus schmitti* in two Southwestern Atlantic coastal areas. *Hydrobiologia* 661: 445–456.
- Cotton PA, Sims DW, Fanshawe S, Chadwick M, 2005. The effect of climate variability on zooplankton and basking shark *Cetorhinus maximus* relative abundance off southwest Britain. *Fish. Oceanogr.* 14: 151–155.
- Curtis TH, Zeeman SI, Summers EL, Cadrin SX, Skomal GB, 2014. Eyes in the sky: Linking satellite oceanography and biotelemetry to explore habitat selection by basking sharks. *Anim. Biotelem.* 2: 12.
- Dambach J, Rödder D, 2011. Applications and future challenges in marine species distribution modeling. *Aquat. Conserv. Mar. Freshw. Ecosyst.* 21: 92–100.
- de Buen F, 1950. El Mar de Solís y su fauna de peces (segunda parte). *Publ. Cient. Serv. Oceanogr. Pesca* 2: 47–144.
- Domingo A, Forselledo R, Miller P, Passadore C, 2008. Plan de acción nacional para la conservación de los condricios en las pesquerías uruguayas. Montevideo: Ministerio de Ganadería, Agricultura y Pesca.
- Drymon JM, Carassou L, Powers SP, Grace M, Dindo J et al., 2013. Multiscale analysis of factors that affect the distribution of sharks throughout the northern Gulf of Mexico. *Fish. Bull.* 111: 370–380.
- Duhamel G, Compagno LJV, 1985. Sharks. In: Fischer W, Hureau JC ed. Southern Ocean: Fishing Areas 48, 58 and 88 (CCAMLR Convention Area). Vol. 1. Rome: FAO Species Identification Sheets for Fishery Purposes, 209–215.
- Ebert DA, Fowler S, Compagno L, 2013. Sharks of the World: A Fully Illustrated Guide. Plymouth: Wild Nature Press.
- Elith J, Phillips SJ, Hastie T, Dudík M, Chee YE et al., 2011. A statistical explanation of MaxEnt for ecologists. *Divers. Distr.* 17: 43–57.
- Etnoyer P, Canny D, Mate B, Morgan L, 2004. Persistent pelagic habitats in the Baja California to Bering Sea (B2B) ecoregion. *Oceanography* 17: 90–101.
- Figueroa DE, 1997. Un nuevo registro de *Lamna nasus* (Bonaparte, 1788) (Pisces, Lamnidae) en proximidades de las Islas Georgias del Sur. *Neotrópica* 43: 112.
- Fowler SL, 2005. *Cetorhinus maximus*. In: IUCN 2013. IUCN

- Red List of Threatened Species. Version 2013.1. [www.iucnredlist.org](http://www.iucnredlist.org). Downloaded on 25 July 2013.
- Fowler SL, 2009a. *Cetorhinus maximus* (Northeast Atlantic sub-population). In: IUCN 2013. IUCN Red List of Threatened Species. Version 2013.1. [www.iucnredlist.org](http://www.iucnredlist.org). Downloaded on 25 July 2013.
- Fowler SL, 2009b. *Cetorhinus maximus* (North Pacific subpopulation). In: IUCN 2013. IUCN Red List of Threatened Species. Version 2013.1. [www.iucnredlist.org](http://www.iucnredlist.org). Downloaded on 25 July 2013.
- Francis MP, Duffy C, 2002. Distribution, seasonal abundance and bycatch of basking sharks *Cetorhinus maximus* in New Zealand, with observations on their winter habitat. *Mar. Biol.* 140: 831–842.
- Gore MA, Rowat D, Hall J, Gell FR, Ormond RF, 2008. Transatlantic migration and deep mid-ocean diving by basking shark. *Biol. Lett.* 4: 395–398.
- Halpern BS, Walbridge S, Selkoe KA, Kappel CV, Micheli F et al., 2008. A global map of human impact on marine ecosystems. *Science* 319: 948–952.
- Heithaus MR, Delius BK, Wirsing AJ, Dunphy-Daly MM, 2009. Physical factors influencing the distribution of a top predator in a subtropical oligotrophic estuary. *Limnol. Oceanogr* 54: 472–482.
- Hernández S, Vögler R, Bustamante C, Lamilla J, 2010. Review of the occurrence and distribution of the basking shark *Cetorhinus maximus* in Chilean waters. *Mar. Biodivers. Records* 3: e67.
- Hijmans RJ, Phillips S, Leathwick J, Elith J, 2013. dismo: Species distribution modeling version 0.8-5. URL: <http://CRAN.R-project.org/package=dismo>.
- Hoffmayer ER, Driggers III WB, Franks JS, Hanisko DS, Roffer MA et al., 2011. Recent occurrences of basking sharks *Cetorhinus maximus* (Chondrichthyes: Cetorhinidae) in the Gulf of Mexico. *Mar. Biodivers. Records* 4: e87.
- Howey-Jordan LA, Brooks EJ, Abercrombie DL, Jordan LKB, Brooks A et al., 2013. Complex movements, phylopatry and expanded depth range of a severely threatened pelagic shark, the oceanic whitetip *Carcharhinus longimanus* in the western North Atlantic. *PLoS ONE* 8: e56588.
- Irigoin X, Huisman J, Harris RP, 2004. Global biodiversity patterns of marine phytoplankton and zooplankton. *Nature* 429: 863–867.
- Jaine FRA, Couturier LIE, Weeks SJ, Townsend KA, Bennett MB et al., 2012. When giants turn up: Sighting trends, environmental influences and habitat use of the manta ray *Manta alfredi* at a coral reef. *PLoS ONE* 7: e46170.
- Lahille F, 1928. Nota sobre unos peces elasmobrancos. *An. Mus. Nac. Hist. Nat. "Bernardino Rivadavia"* 34: 299–339.
- Lam VYY, Sadovy de Mitcheson Y, 2011. The sharks of South East Asia: Unknown, unmonitored and unmanaged. *Fish Fish.* 12: 51–74.
- Last PR, Stevens JD, 2009. *Sharks and Rays of Australia*. 2<sup>nd</sup> edn. Cambridge: Harvard University Press.
- Liu C, White M, Newell G, 2013. Selecting thresholds for the prediction of species occurrence with presence-only data. *J. Biogeogr.* 40: 778–789.
- Lopes RM, Brandini FP, Gaeta FA, 1999. Distribution patterns of epipelagic copepods off Rio de Janeiro (SE Brazil) in summer 1991/1992 and winter 1992. *Hydrobiologia* 411: 161–174.
- Luiz Jr OJ, Balboni AP, Kodja G, Andrade M, Marum H, 2009. Seasonal occurrences of *Manta birostris* (Chondrichthyes: Mobulidae) in southeastern Brazil. *Ichthyol. Res.* 56: 96–99.
- Lucifora LO, García VB, Menni RC, Worm B, 2012. Spatial patterns in the diversity of sharks, rays and chimaeras (Chondrichthyes) in the Southwest Atlantic. *Biodivers. Conserv.* 21: 407–419.
- MacLeod CD, Mandelberg L, Schweder C, Bannon SM, Pierce GJ, 2008. A comparison of approaches for modelling the occurrence of marine animals. *Hydrobiologia* 612: 21–32.
- Magnussen JE, Pikitch EK, Clarke SC, Nicholson C, Hoelzel AR et al., 2007. Genetic tracking of basking shark products in international trade. *Anim. Conserv.* 10: 199–207.
- McKinnell S, Seki MP, 1998. Shark bycatch in the Japanese high seas squid driftnet fishery in the North Pacific Ocean. *Fish. Res.* 39: 127–138.
- McKinney JA, Hoffmayer ER, Wu W, Fulford R, Hendon JM, 2012. Feeding habitat of the whale shark *Rhincodon typus* in the northern Gulf of Mexico determined using species distribution modelling. *Mar. Ecol. Prog. Ser.* 458: 199–211.
- Montú M, Gloeden IM, Duarte AK, Resgalla Jr C, 1997. Zooplankton. In: Seeliger U, Odebrecht C, Castello JP ed. *Subtropical Convergence Environments: The Coast and Sea in the Southwestern Atlantic*. Berlin: Springer, 110–114.
- Muelbert JH, Acha M, Mianzan H, Guerrero R, Reta R et al., 2008. Biological, physical and chemical properties at the Subtropical Shelf Front Zone in the SW Atlantic continental shelf. *Cont. Shelf Res.* 28: 1662–1673.
- Nasby-Lucas N, Dewar H, Lam CH, Goldman KJ, Domeier ML, 2009. White shark offshore habitat: A behavioral and environmental characterization of the eastern Pacific shared offshore foraging area. *PLoS ONE* 4(12): e8163.
- Norman JR, 1937. *Coast fishes. Part II. The Patagonian region*. *Discov. Rep.* 16: 1–150.
- Perier MR, Estalles M, Coller NM, Suarez MN, Mora GJ et al., 2011. Chondrichthyans of the San Matías Gulf, Patagonia, Argentina. *Rev. Mus. Arg. Cienc. Nat. n.s.* 13: 213–220.
- Phillips SJ, Anderson RP, Schapire RE, 2006. Maximum entropy modeling of species geographic distributions. *Ecol. Modell.* 190: 231–259.
- R Core Team, 2012. *R: A Language and Environment for Statistical Computing*. Vienna: R Foundation for Statistical Computing.
- Royer F, Fromentin JM, Gaspar P, 2004. Association between bluefin tuna schools and oceanic features in the western Mediterranean. *Mar. Ecol. Prog. Ser.* 269: 249–263.
- Royle JA, Chandler RB, Yackulic C, Nichols JD, 2012. Likelihood analysis of species occurrence probability from presence-only data for modelling species distributions. *Methods Ecol. Evol.* 3: 545–554.
- Sabatini ME, Álvarez Colombo GL, 2001. Seasonal pattern of zooplankton biomass in the Argentinian shelf off Southern Patagonia (45°–55°S). *Sci. Mar.* 65: 21–31.
- Sakko AL, 1998. The influence of the Benguela upwelling system on Namibia's marine biodiversity. *Biodivers. Conserv.* 7: 419–433.
- Saunders RA, Royer F, Clarke MW, 2011. Winter migration and diving behaviour of porbeagle shark *Lamna nasus* in the

- Northeast Atlantic. ICES J. Mar. Sci. 68: 166–174.
- Sequeira AMM, Mellin C, Meekan MG, Sims DW, Bradshaw CJA, 2013. Inferred global connectivity of whale shark *Rhincodon typus* populations. J. Fish Biol. 82: 367–389.
- Sequeira A, Mellin C, Rowat D, Meekan MG, Bradshaw CJA, 2012. Ocean-scale prediction of whale shark distribution. Divers. Distr. 18: 504–518.
- Siccardi E, 1960. *Cetorhinus* en el Atlántico Sur. Rev. Mus. Arg. Cienc. Nat. “Bernardino Rivadavia” (Zool.) 6: 61–101.
- Siders ZA, Westgate AJ, Johnston DW, Murison LD, Koopman HN, 2013. Seasonal variation in the spatial distribution of basking sharks *Cetorhinus maximus* in the lower Bay of Fundy, Canada. PLoS ONE 8: e82074.
- Sims DW, 2008. Sieving a living: A review of the biology, ecology and conservation status of the plankton-feeding basking shark *Cetorhinus maximus*. Advances Mar. Biol. 54: 171–220.
- Sims DW, Fox AM, Merrett DA, 1997. Basking shark occurrence off south-west England in relation to zooplankton abundance. J. Fish Biol. 51: 436–440.
- Sims DW, Merrett DA, 1997. Determination of zooplankton characteristics in the presence of surface feeding basking sharks *Cetorhinus maximus*. Mar. Ecol. Prog. Ser. 158: 297–302.
- Sims DW, Quayle VA, 1998. Selective foraging behaviour of basking sharks on zooplankton in a small-scale front. Nature 393: 460–464.
- Sims DW, Reid PC, 2002. Congruent trends in long-term zooplankton decline in the north-east Atlantic and basking shark *Cetorhinus maximus* fishery catches off west Ireland. Fish. Oceanogr. 11: 59–63.
- Sims DW, Southall EJ, Richardson AJ, Reid PC, Metcalfe JD, 2003. Seasonal movements and behaviour of basking sharks from archival tagging: No evidence of winter hibernation. Mar. Ecol. Prog. Ser. 248: 187–196.
- Skomal GB, Wood G, Caloyianis N, 2004. Archival tagging of a basking shark *Cetorhinus maximus* in the western North Atlantic. J. Mar. Biol. Assoc. UK 84: 795–799.
- Skomal GB, Zeeman SI, Chisholm JH, Summers EL, Walsh HJ et al., 2009. Transequatorial migrations by basking sharks in the western Atlantic Ocean. Curr. Biol. 19: 1019–1022.
- Soldo A, Lučić D, Jardas I, 2008. Basking shark *Cetorhinus maximus* occurrence in relation to zooplankton abundance in the eastern Adriatic Sea. Cybium 32: 103–109.
- Soto JMR, 2000. Sobre a presença do tubarão-peregrino *Cetorhinus maximus* (Gunnerus, 1765) (Lamniformes, Cetorhinidae) em águas brasileiras. Biotemas 13: 73–88.
- Soto JMR, Mincarone MM, Colasso GG, 2007. Novas descobertas acerca da captura intencional do tubarão-peregrino *Cetorhinus maximus* (Gunnerus, 1765) (Lamniformes, Cetorhinidae) na costa de Santa Catarina. XII Congresso Latinoamericano de Ciências do Mar, Florianópolis, Brazil.
- Southall EJ, Sims DW, Metcalfe JD, Doyle JI, Fanshawe S et al., 2005. Spatial distribution patterns of basking sharks on the European shelf: Preliminary comparison of satellite-tag geolocation, survey and public sightings data. J. Mar. Biol. Assoc. UK 85: 1083–1088.
- Southall EJ, Sims DW, Witt MJ, Metcalfe JD, 2006. Seasonal space-use estimates of basking sharks in relation to protection and political-economic zones in the North-east Atlantic. Biol. Conserv. 132: 33–39.
- Tyberghien L, Verbruggen H, Pauly K, Troupin C, Mineur F et al., 2012. Bio-ORACLE: A global environmental dataset for marine species distribution modelling. Global Ecol. Biogeogr. 21: 272–281.
- Tyedmers PH, Watson R, Pauly D, 2005. Fueling global fishing fleets. AMBIO 34: 635–638.
- Van Der Molen S, Caille G, González R, 1998. By-catch of sharks in Patagonian coastal trawl fisheries. Mar. Freshwater Res. 49: 641–641.
- Verheye HM, 2000. Decadal-scale trends across several marine trophic levels in the southern Benguela upwelling system off South Africa. AMBIO 29: 30–34.
- Verheye HM, Richardson AJ, Hutchings L, Marska G, Gianakouras D, 1998. Long-term trends in the abundance and community structure of coastal zooplankton in the southern Benguela system, 1951–1996. S. Afr. J. Mar. Sci. 19: 317–332.
- Waldron HN, Probyn TA, 1992. Nitrate supply and potential new production in the Benguela upwelling system. S. Afr. J. Mar. Sci. 12: 29–39.
- Ware DM, Thomson RE, 2005. Bottom-up ecosystem trophic dynamics determines fish production in the northeast Pacific. Science 308: 1280–1284.
- Weltz K, Kock AA, Winker H, Attwood C, Sikweyiya M, 2013. The influence of environmental variables on the presence of white sharks *Carcharodon carcharias* at two popular Cape Town bathing beaches: A generalized additive mixed model. PLoS ONE 8: e68554.
- Worm B, Lotze HK, Myers RA, 2003. Predator diversity hotspots in the blue ocean. Proc. Nat. Acad. Sci. 100: 9884–9888.
